# Supplementary material
Source: PubMed Central journal article supplement (PMC3226000)
Supplement: JCI58577sd.pdf [file JCI58577sd.pdf]

## SUPPLEMENTAL TABLES

**Supplemental Table 1.** Cytokine secretion into the media from WT and  $\beta I^{-/-}$  BMDM treated with 0.5 mM palmitate for 12 h.

|                                       | WT             | $\beta I^{-/-}$  |
|---------------------------------------|----------------|------------------|
| <b>IL-10</b> (pg/ml)                  | 93.1 $\pm$ 19  | 53 $\pm$ 12*     |
| <b>TNF<math>\alpha</math></b> (pg/ml) | 18.2 $\pm$ 2.6 | 26.7 $\pm$ 0.39* |
| <b>IL-6</b> (pg/ml)                   | 11.9 $\pm$ 2.2 | 19.2 $\pm$ 2.1*  |

Data are presented as mean  $\pm$  SEM of n=3 independent experiments \*p<0.05

**Supplemental Table 2.** IL-1 $\beta$  is elevated in obese but not lean  $\beta I^{-/-}$  BMT livers

| <b>IL-1<math>\beta</math></b> (ng/mg tissue) | WT <sup>BMT</sup>            | $\beta I^{-/-}$ BMT          |
|----------------------------------------------|------------------------------|------------------------------|
| <b>Chow</b>                                  | 2.43 $\pm$ 0.1               | 2.28 $\pm$ 0.1               |
| <b>HFD</b>                                   | 5.21 $\pm$ 0.32 <sup>#</sup> | 6.52 $\pm$ 0.2* <sup>#</sup> |

Data are presented as mean  $\pm$  SEM of n=6. \* represents p<0.05 compared to WT<sup>BMT</sup> controls and <sup>#</sup> represents p<0.01 compared to chow.

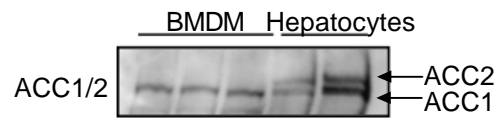

**Supplementary figure S1. BMDM express exclusively ACC1.** BMDM and hepatocytes isolated from WT mice were lysed and ACC1 and ACC2 isoforms detected using streptavidin-horseradish peroxidase.

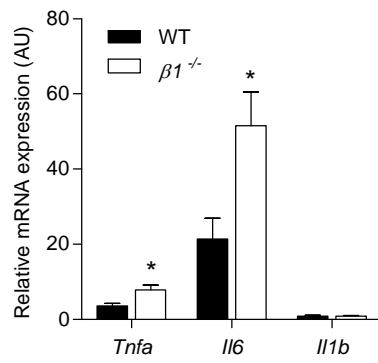

**Supplementary figure S2. Inflammatory response of WT and  $\beta 1^{-/-}$  BMDM to stearic acid.** mRNA expression of *Tnfa*, *Il6* and *Il1b* from WT and  $\beta 1^{-/-}$  BMDM treated with stearate (0.5 mM) for 24 h. Data are expressed as means  $\pm$  SEM, n=3, from at least two independent experiments, \* p<0.05 compared to WT. Relative expression was normalized to *Actb*.

**A**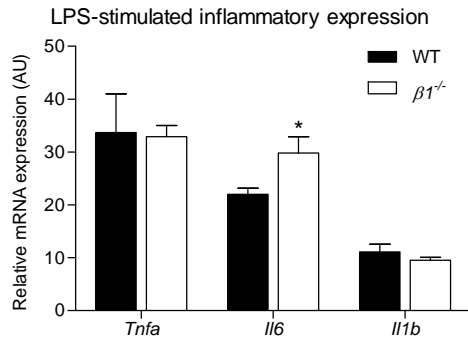**B**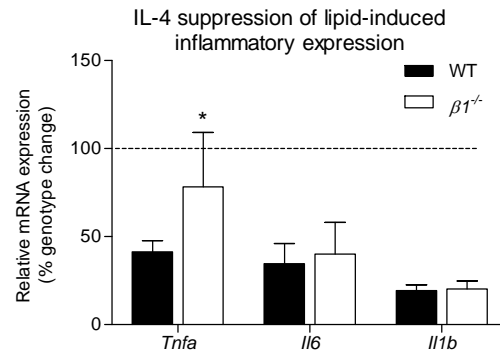

**Supplementary figure S3.  $\beta 1^{-/-}$  BMDM response to canonical inflammatory and anti-inflammatory stimuli.** WT and  $\beta 1^{-/-}$  BMDM were incubated with 100 ng/ml LPS for 6 h, and mRNA expression of *Tnfa*, *Il6* and *Il1b* was determined. (B) Cells were treated with palmitate (0.5 mM) to induce inflammation for 4 h. Media was then supplemented with IL-4 (50 ng/ml) for a further 4 h and mRNA expression of *Tnfa*, *Il6*, and *Il1b* was determined. Data are expressed as means  $\pm$  SEM, n=3, from at least two independent experiments, \* p<0.05 compared to WT. Relative expression was normalized to *Actb*.

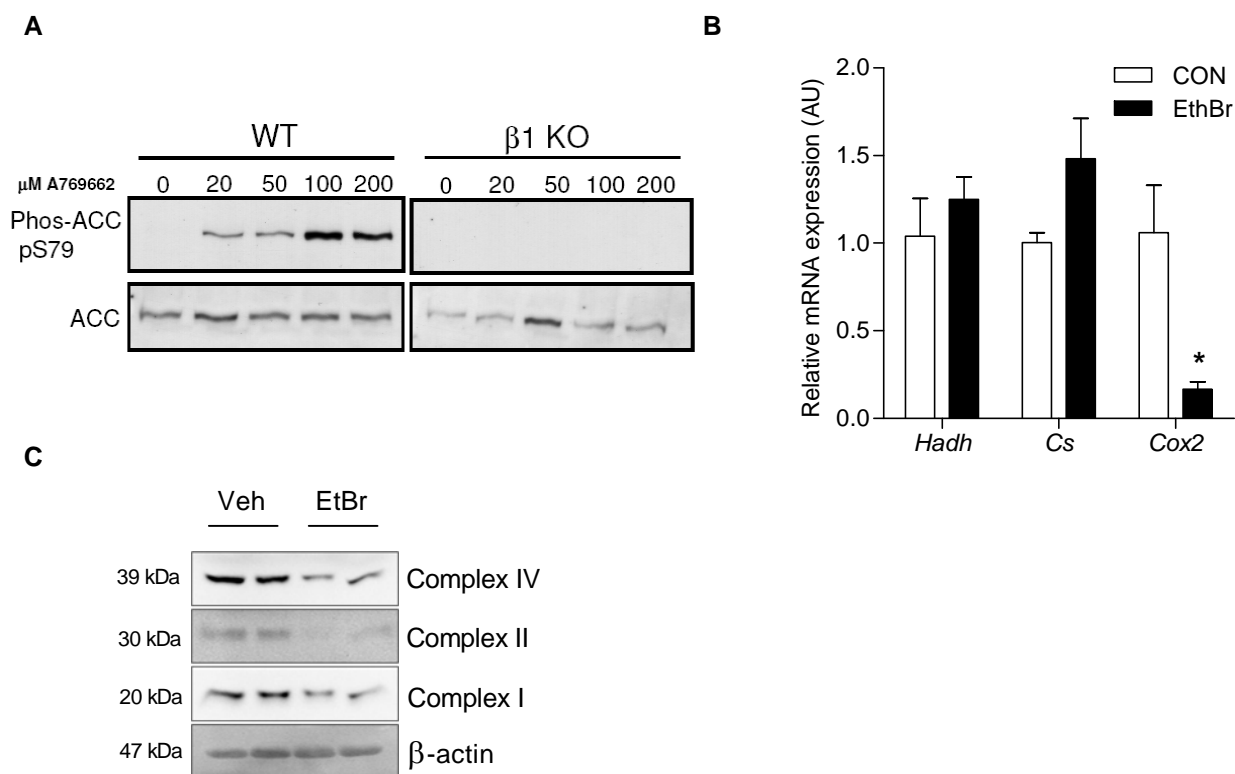

**Supplementary figure S4. Activation of  $\beta 1$  specific complexes and mitochondrial depletion with ethidium bromide.** (A) A769662 dose dependently increases ACC phosphorylation in WT, but not  $\beta 1^{-/-}$  BMDM. WT BMDM were treated with ethidium bromide (EthBr-0.4  $\mu\text{g}/\text{ml}$ ) for 48 h and (B) mRNA for *Cs*, *Bhad* (nuclear encoded mitochondrial enzymes) or *Cox2* (mitochondrial encoded) were analyzed using RT-qPCR relative to *Actb* or (C) mitochondrial protein expression of Complex I, II and IV were determined using immunoblot.

A

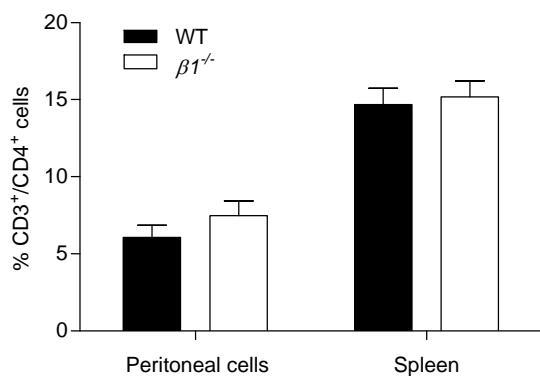

B

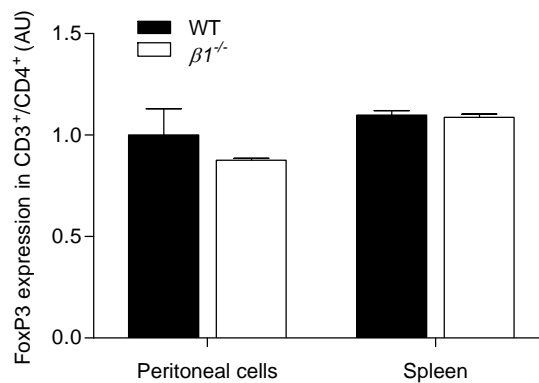

C

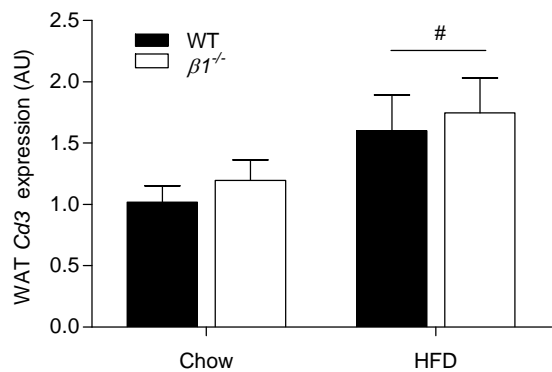

D

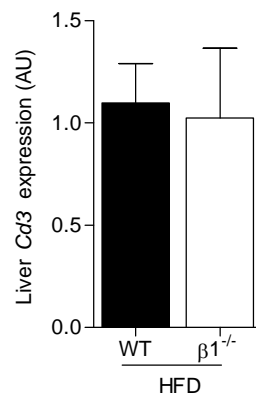

**Supplementary figure S5. T-cell activation and T-cell infiltration into adipose and liver is not affected by AMPK  $\beta 1$  deletion.** Peritoneal cells and splenocytes from  $\beta 1^{-/-}$  and WT littermates were stained with antibodies for CD3, CD4 and Foxp3 and analyzed by flow cytometry. (A) The percentage of CD3<sup>+</sup>/CD4<sup>+</sup> cells in the peritoneal cell and splenocyte population and (B) Foxp3 expression in the CD3<sup>+</sup>/CD4<sup>+</sup> population were not different between genotypes. (C) Adipose tissue of chow and HFD-fed WT<sup>BMT</sup> and  $\beta 1^{-/-}$  BMT mice or (D) livers of HFD-fed WT<sup>BMT</sup> and  $\beta 1^{-/-}$  BMT mice was analyzed for *Cd3* mRNA expression by qRT-PCR as a marker of T-cell infiltration, where the expression of genes was normalized to *Actb*. Data shown are mean  $\pm$  SEM.

A

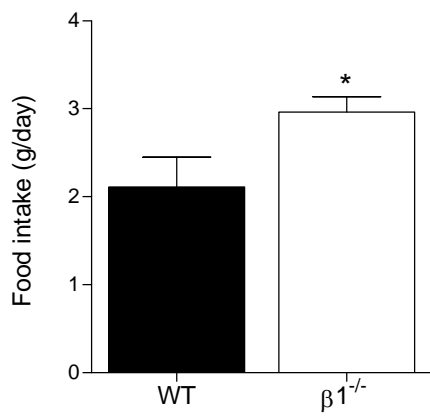

B

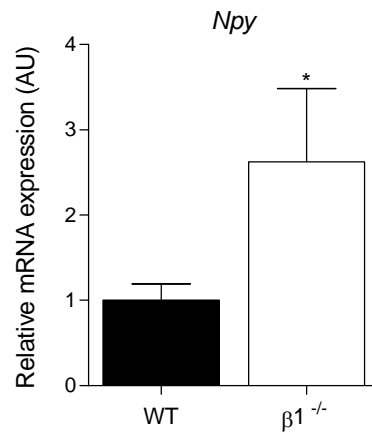

C

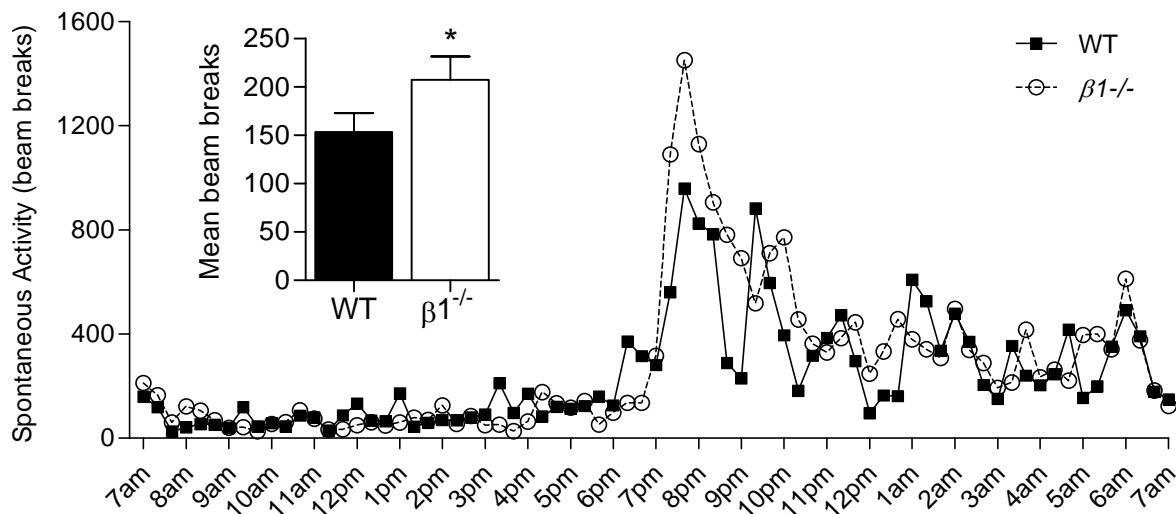

### Supplementary figure S6. $\beta 1^{-/-}$ BMT mice have increased food intake and activity.

Metabolic parameters were measured with the Columbus Laboratory Animals Monitoring System.  $\beta 1^{-/-}$  BMT mice had (A) increased food intake and (B) elevated hypothalamic *Npy* mRNA when normalized to *18s*, but did not have higher body mass potentially due an increase in (C) physical activity levels. Data are expressed as mean  $\pm$  SEM, n=8-10, \* p<0.05 compared to WT BMT.

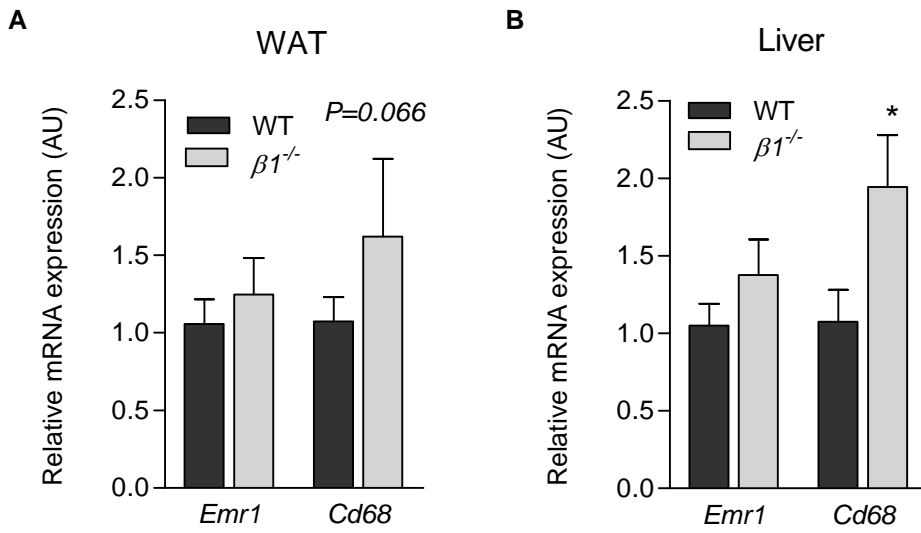

**Supplementary figure S7. Adipose and liver markers of macrophage infiltration in mice fed a chow diet.** (A) Adipose tissue and (B) liver from WT<sup>BMT</sup> and  $\beta 1^{-/-}$  BMT mice on a chow diet were analyzed for mRNA expression of *Emr1* (F4/80) and *Cd68* by qRT-PCR. Relative expression was normalized to *Actb*, \*  $p < 0.05$  compared to WT<sup>BMT</sup>. Data shown are, mean  $\pm$  SEM,  $n=8-10$ .



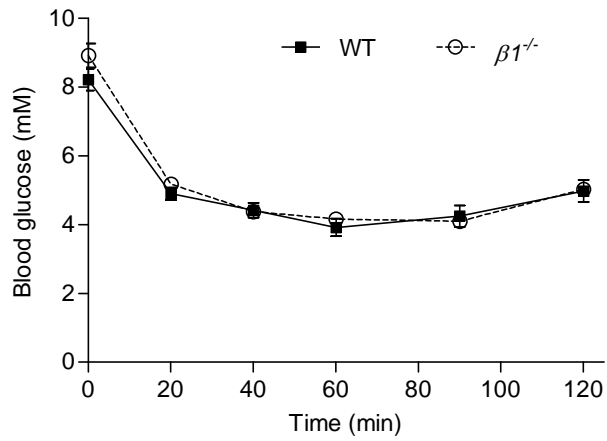

**Supplementary figure S8. Insulin sensitivity is maintained in  $\beta 1^{-/-}$  <sup>BMT</sup> mice fed a chow diet.** WT <sup>BMT</sup> and  $\beta 1^{-/-}$  <sup>BMT</sup> mice fed a chow diet were fasted for 6 h and an insulin tolerance test was performed after an intraperitoneal injection of 0.5 U/kg of insulin. Data shown are mean  $\pm$  SEM, n=8-10.
